# Supplementary material for: Pax6 loss alters the morphological and electrophysiological development of mouse prethalamic neurons
Source: Oxford University Press journal article supplement (doi:10.1242/dev.200052), 2022-02-28
Supplement: dev200052supp.pdf [file dev200052supp.pdf]

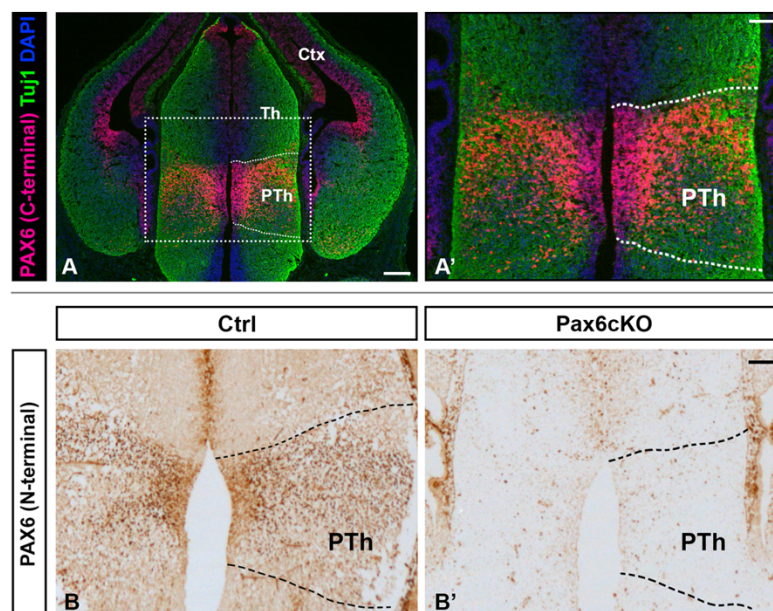

Supplementary figure 1

**Fig. S1.** (A-A') Immunohistochemistry showing Pax6 expression overlapping with Tuj1, a marker for postmitotic neurons, in the E13.5 prethalamus of the control littermate. PTh, prethalamus, Th, thalamus, Ctx, cortex. (B-B') Pax6 immunohistochemistry at E13.5 showing  $CAG^{CreER}$ -induced loss of Pax6 in the prethalamus following tamoxifen administration at E9.5. (C) The top 14 most highly enriched, non-redundant GO terms related to neuronal morphogenesis and (D) the top 7 most highly enriched, non-redundant GO terms related to ion transport in the Pax6 cKO prethalamus. Scale bar: (A) 250  $\mu$ m; (A', B-B') 100 $\mu$ m. See also Supplementary Table 1.

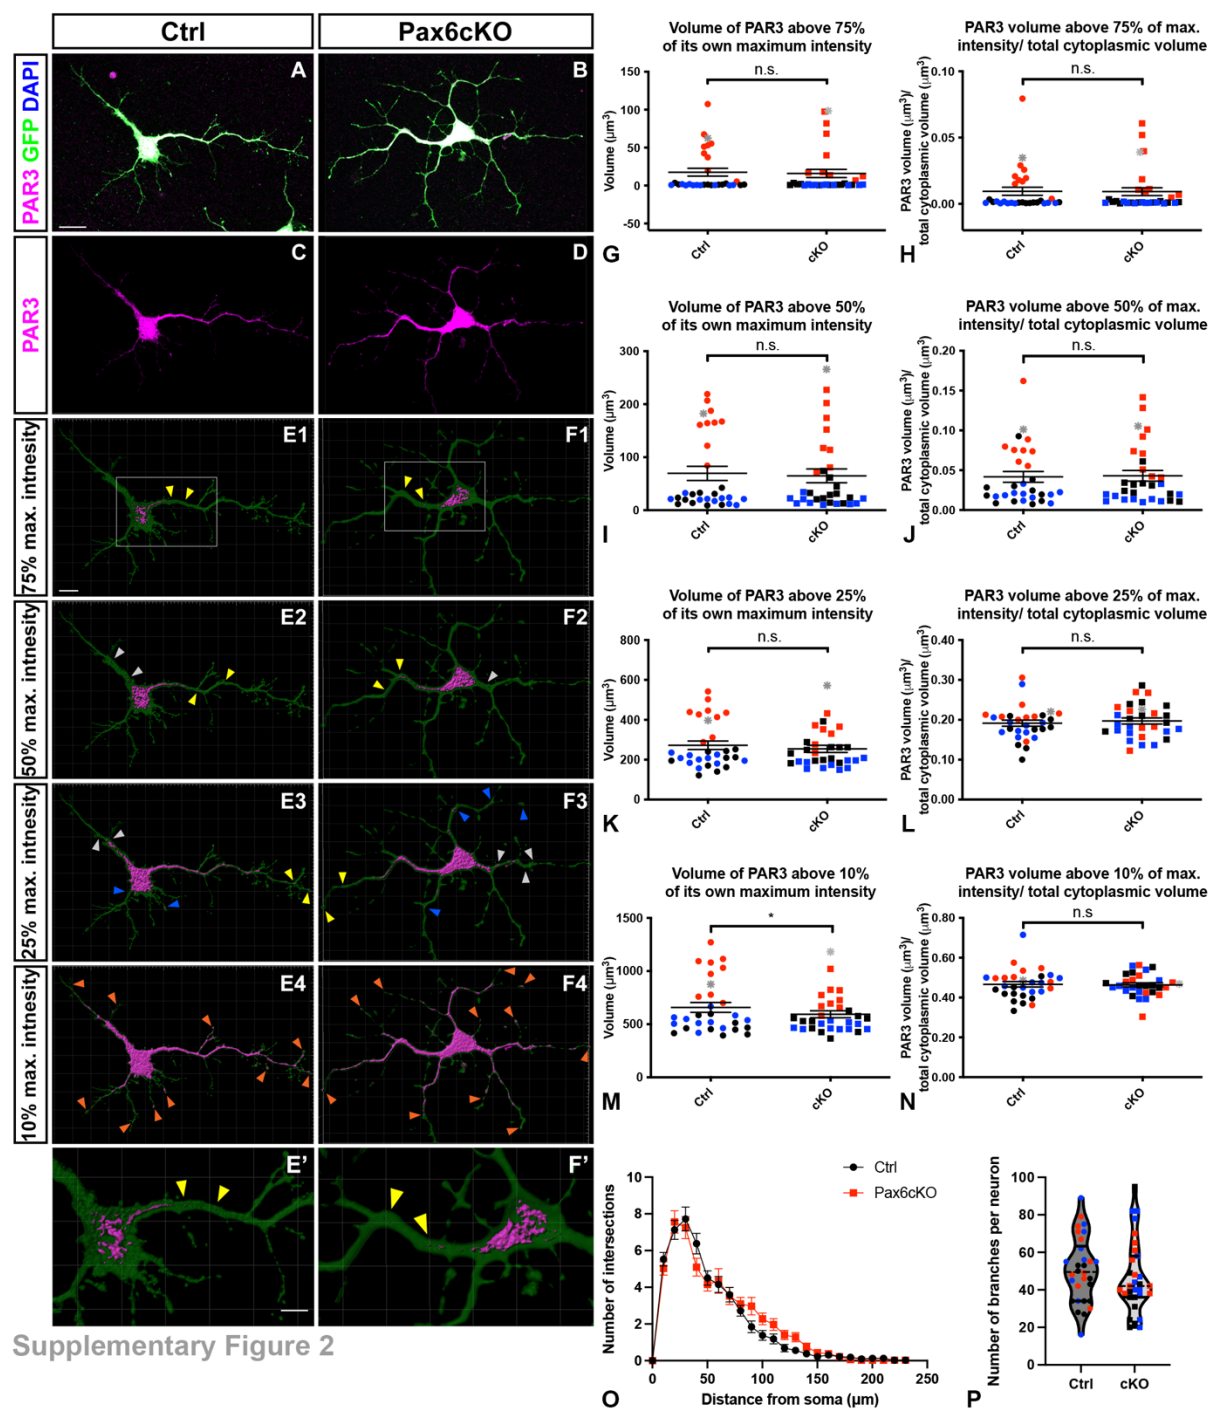

**Fig. S2. Distribution of Par3 proteins and neurite branching of the developing prethalamic neurons at 3DIV.** (A, B) Prethalamic neurons from the Ctrl (A) and Pax6cKO (B) embryos were cultured for 3DIV and stained for Par3, GFP and DAPI. (C, D) Par3 expression within the cytoplasm of the neurons. (E1-F1) Par3 expression within the cytoplasm when the intensity threshold was set at 75% of the maximum intensity of the Par3 channel. The majority of the Par3 volumes were distributed within the soma. However, Par3 volumes were also found in the stem of the longest neurites (yellow arrowheads). (E2-F2) Par3 expression within the cytoplasm when the intensity threshold was set at 50% of the maximum intensity of the Par3 channel.

More Par3 volumes were detected in the soma, the stem of the longest neurites (yellow arrowheads), as well as in other neurites (grey arrowheads). **(E3-F3)** Par3 expression within the cytoplasm when the intensity threshold was set at 25% of the maximum intensity of the Par3 channel. Par3 volumes within the cytoplasm continued to increase. Par3 volumes could be found at the tip of the longest neurites (yellow arrowheads) and other neurites (grey and blue arrowheads). **(E4-F4)** Par3 expression within the cytoplasm when the intensity threshold was set at 10% of the maximum intensity of the Par3 channel. PAR3 volumes had filled up the cytoplasm and could be found at almost all the tip of the neurites and protrusions (orange arrowheads). **(E'-F')** Zoom in on the boxed area in E1 and F1. Scale bars: A-D, 15 $\mu$ m, E1-F5, 10 $\mu$ m, E'-F', 5 $\mu$ m. **(G-N)** Comparison of Par3 volumes and percentage of Par3 volumes against the cytoplasmic volume between the Ctrl and the Pax6cKO prethalamic neurons. Each dot (data point) represented the value of Par3 volume (G, I, K, M) or Par3 volume/ total cytoplasmic volume (H, J, L, N) from each neuron at a specific threshold. Data derived from the corresponding images in panels A-F are shown as grey asterisks in panels G-N. 10 neurons with the Ctrl and Pax6cKO genotypes from each of 3 cultures from separate litters were measured. Mixed-effect model. Mean  $\pm$  SEM. \*:  $p < 0.05$ . The data points of the neurons from the same litter were marked with the same colour. **(O)** Sholl analysis showed no significant difference in the number of neurite intersections between 10 and 240  $\mu$ m from the soma between the Pax6cKO and the control prethalamic neurons,  $p = 0.194$ . **(P)** Evaluation of number of branches per neuron showed no significant difference between the Pax6cKO and the control prethalamic neurons,  $p = 0.238$ . 10 neurons with the Ctrl and Pax6cKO genotypes from each of 3 cultures from separate litters were measured. Mixed-effect model. Mean  $\pm$  SEM.

**Table S1.** List of significantly up- and downregulated (adjusted  $p < 0.05$ ) genes and GO terms in the E13.5 prethalamus after induced acute Pax6 deletion at E9.5. Related to Figure 1.

| Genes                                      | LFC  | P value  | Description                                               |
|--------------------------------------------|------|----------|-----------------------------------------------------------|
| <b>GEFs for Rac</b>                        |      |          |                                                           |
| Dock4                                      | 1.03 | 3.39E-10 | dedicator of cytokinesis 4                                |
| Dock2                                      | 0.86 | 0.00196  | dedicator of cytokinesis 2                                |
| Dock3                                      | 0.68 | 0.00300  | dedicator of cytokinesis 3                                |
| Dock9                                      | 0.66 | 0.00671  | dedicator of cytokinesis 9                                |
| Dock10                                     | 0.76 | 0.00339  | dedicator of cytokinesis 10                               |
| Dock8                                      | 0.95 | 0.00178  | dedicator of cytokinesis 8                                |
| <b>Scaffold for GEFs</b>                   |      |          |                                                           |
| Elmo1                                      | 0.87 | 2.21E-10 | engulfment and cell motility 1                            |
| <b>Scaffold for CDC42</b>                  |      |          |                                                           |
| Fgd1                                       | 0.57 | 0.00362  | FYVE, RhoGEF and PH domain containing 1                   |
| Fgd5                                       | 1.04 | 3.11E-05 | FYVE, RhoGEF and PH domain containing 5                   |
| Fgd2                                       | 0.67 | 0.00234  | FYVE, RhoGEF and PH domain containing 2                   |
| Fgd6                                       | 0.65 | 0.00503  | FYVE, RhoGEF and PH domain containing 6                   |
| <b>GAP for Rho and Rac</b>                 |      |          |                                                           |
| Srgap3                                     | 0.92 | 0.00086  | SLIT-ROBO Rho GTPase activating protein 3                 |
| <b>Rac</b>                                 |      |          |                                                           |
| Rnd1                                       | 0.77 | 2.55E-07 | Rho family GTPase 1                                       |
| <b>Actin-bundling</b>                      |      |          |                                                           |
| Ablim1                                     | 0.59 | 0.00253  | actin-binding LIM protein 1                               |
| Ablim3                                     | 1.19 | 7.20E-07 | actin binding LIM protein family, member 3                |
| Ablim2                                     | 0.91 | 0.00342  | actin-binding LIM protein 2                               |
| Strip2                                     | 1.80 | 4.32E-07 | striatin interacting protein 2                            |
| <b>Anti-capping for actin</b>              |      |          |                                                           |
| Enah                                       | 0.67 | 0.00391  | enabled homolog (Drosophila)                              |
| <b>Membrane curvature</b>                  |      |          |                                                           |
| Pacsin1                                    | 0.81 | 0.00546  | protein kinase C and casein kinase substrate in neurons 1 |
| <b>Microtubule polymerisation/bundling</b> |      |          |                                                           |
| Mapt                                       | 1.16 | 4.90E-08 | microtubule-associated protein tau                        |
| Map6                                       | 0.70 | 0.00732  | microtubule-associated protein 6                          |
| Map9                                       | 0.60 | 0.00746  | microtubule-associated protein 9                          |
| Map2                                       | 0.32 | 0.01108  | microtubule-associated protein 2                          |
| Mark1                                      | 0.78 | 0.00014  | MAP/microtubule affinity-regulating kinase 1              |
| Mark4                                      | 0.76 | 0.00720  | MAP/microtubule affinity-regulating kinase 4              |
| Apc2                                       | 0.86 | 0.00485  | adenomatosis polyposis coli 2                             |
| Apc                                        | 0.78 | 0.00820  | adenomatosis polyposis coli                               |

|                                                                           |      |          |                                                                       |
|---------------------------------------------------------------------------|------|----------|-----------------------------------------------------------------------|
| Crmp1                                                                     | 0.32 | 0.00312  | collapsin response mediator protein 1                                 |
| Dpysl5                                                                    | 0.66 | 0.00500  | dihydropyrimidinase-like 5                                            |
| <b>Par3/6 complex component</b>                                           |      |          |                                                                       |
| Prkcz                                                                     | 0.37 | 0.00431  | protein kinase C, zeta                                                |
| Kif3a                                                                     | 0.45 | 0.00484  | kinesin family member 3A                                              |
| Tiam1                                                                     | 0.66 | 0.00821  | T cell lymphoma invasion and metastasis 1                             |
| Arhgap35                                                                  | 0.59 | 0.01060  | Rho GTPase activating protein 35                                      |
| Smurf1                                                                    | 0.53 | 0.00328  | SMAD specific E3 ubiquitin protein ligase 1                           |
| Pard3b                                                                    | 0.80 | 0.00822  | par-3 family cell polarity regulator beta                             |
| Apc                                                                       | 0.78 | 0.00820  | adenomatosis polyposis coli                                           |
| <b>Cytoskeleton protein in the axon initial segment</b>                   |      |          |                                                                       |
| Ank3                                                                      | 1.19 | 0.00105  | ankyrin 3, epithelial                                                 |
| Sptb                                                                      | 1.17 | 0.00054  | spectrin beta, erythrocytic                                           |
| Sptbn1                                                                    | 1.03 | 0.00096  | spectrin beta, non-erythrocytic 1                                     |
| Sptbn4                                                                    | 1.36 | 4.52E-06 | spectrin beta, non-erythrocytic 4                                     |
| <b>Voltage-gated Sodium channels (VGSCs)</b>                              |      |          |                                                                       |
| Scn1a                                                                     | 0.77 | 0.00123  | sodium channel, voltage-gated, type I, alpha                          |
| Scn3b                                                                     | 0.72 | 2.96E-06 | sodium channel, voltage-gated, type III, beta                         |
| Scn2b                                                                     | 0.58 | 0.00118  | sodium channel, voltage-gated, type II, beta                          |
| Scn3a                                                                     | 0.39 | 0.00502  | sodium channel, voltage-gated, type III, alpha                        |
| <b>Rapidly inactivating A-type K<sup>+</sup> channel</b>                  |      |          |                                                                       |
| Kcna4                                                                     | 1.87 | 1.40E-16 | potassium voltage-gated channel, shaker-related subfamily, member 4   |
| Kcnc3                                                                     | 1.02 | 0.00040  | potassium voltage gated channel, Shaw-related subfamily, member 3     |
| Kcnc4                                                                     | 0.79 | 0.00252  | potassium voltage gated channel, Shaw-related subfamily, member 4     |
| Kcnd1                                                                     | 0.61 | 0.00769  | potassium voltage-gated channel, Shal-related family, member 1        |
| Kcnd3                                                                     | 1.02 | 3.78E-10 | potassium voltage-gated channel, Shal-related family, member 3        |
| Kcnd2                                                                     | 0.84 | 9.81E-07 | potassium voltage-gated channel, Shal-related family, member 2        |
| <b>Voltage-gated Ca<sup>2+</sup> channels</b>                             |      |          |                                                                       |
| Cacna1e                                                                   | 1.09 | 0.00012  | calcium channel, voltage-dependent, R type, alpha 1E subunit          |
| Cacna2d2                                                                  | 0.68 | 0.00930  | calcium channel, voltage-dependent, alpha 2/delta subunit 2           |
| Cacna1a                                                                   | 0.61 | 0.00114  | calcium channel, voltage-dependent, P/Q type, alpha 1A subunit        |
| Cacna2d4                                                                  | 1.87 | 2.98E-08 | calcium channel, voltage-dependent, alpha 2/delta subunit 4           |
| Cacna1g                                                                   | 1.21 | 4.11E-07 | calcium channel, voltage-dependent, T type, alpha 1G subunit          |
| <b>Hyperpolarization-activated cyclic nucleotide-gated (HCN) channels</b> |      |          |                                                                       |
| Hcn2                                                                      | 0.95 | 1.12E-05 | hyperpolarization-activated, cyclic nucleotide-gated K <sup>+</sup> 2 |
| Hcn4                                                                      | 0.70 | 0.00481  | hyperpolarization-activated, cyclic nucleotide-gated K <sup>+</sup> 4 |
| Hcn3                                                                      | 0.40 | 0.00852  | hyperpolarization-activated, cyclic nucleotide-gated K <sup>+</sup> 3 |

**Table S2.** List of genes found in the neuronal morphogenesis and ion transport GO terms that encode proteins with specific neuronal functions. LFC, log-fold change.

[Click here to download Table S2](#)

**Table S3. Key resources**

| Reagent or resource                                                    | Source                                                         | Identifier                       |
|------------------------------------------------------------------------|----------------------------------------------------------------|----------------------------------|
| <b>Antibodies</b>                                                      |                                                                |                                  |
| Rabbit polyclonal anti-Pax6 (1:200)                                    | BioLegend                                                      | Cat#901301, RRID:<br>AB_2565003  |
| Mouse monoclonal anti-Pax6 (1:10)                                      | A gift from Prof. V van Heyningen, AD2.38 Simpson et al., 2009 | N/A                              |
| Mouse monoclonal anti-Beta III tubulin (Tuj1) (1:200)                  | Abcam                                                          | Cat# ab18207, RRID:<br>AB_444319 |
| Mouse monoclonal anti-Ankyrin-G, clone N106/36 (1:200)                 | Antibodies Inc.                                                | Cat# 75-146                      |
| Monoclonal Anti-Sodium Channel, Pan antibody produced in mouse (1:100) | Sigma-Aldrich                                                  | Cat# S8809-.1MG                  |
| Rabbit polyclonal Anti-Partitioning-defective 3 Antibody (1:100)       | Millipore                                                      | Cat# 07-330                      |
| Goat polyclonal Anti-GFP antibody (1:200)                              | Abcam                                                          | Cat# ab6673                      |
| Chicken polyclonal Anti-GFP antibody (1:200)                           | Abcam                                                          | Cat# ab13970                     |
| Goat anti-mouse biotinylated secondary antibody (1:200)                | Vector laboratories                                            | Cat# BA-9200,<br>RRID:AB_2336171 |
| Goat anti-rabbit biotinylated secondary antibody (1:200)               | Vector laboratories                                            | Cat# BA-1000,<br>RRID:AB_2313606 |
| Donkey anti-mouse Alexa 568 secondary antibody (1:200)                 | Thermo Fisher Scientific                                       | Cat# A10037,<br>RRID:AB_2534013  |
| Donkey anti-rabbit Alexa 647 secondary antibody (1:200)                | Invitrogen                                                     | Cat # A-31573                    |
| Donkey anti-chicken Alexa 488 secondary antibody (1:200)               | Stratech Scientific Limited                                    | Cat# 703-545-155-JIR             |
| Donkey anti-rabbit Alexa 568 secondary antibody (1:200)                | Invitrogen                                                     | Cat # A10042                     |
| Donkey anti-goat Alexa 488 secondary antibody (1:200)                  | Invitrogen                                                     | Cat # A-11055                    |
| Donkey anti-rat Alexa 488 secondary antibody (1:200)                   | Thermo Fisher Scientific                                       | Cat# A-21208,<br>RRID:AB_141709  |
| Streptavidin, Alexa Fluor 488 conjugate antibody (1:200)               | Thermo Fisher Scientific                                       | Cat# S11223,<br>RRID:AB_2336881  |
| <b>Chemicals, Peptides, and Recombinant Proteins</b>                   |                                                                |                                  |
| Tamoxifen                                                              | Sigma-Aldrich                                                  | T5648; CAS: 10540-29-1           |
| <b>Critical Commercial Assays</b>                                      |                                                                |                                  |

| Reagent or resource                           | Source                                                   | Identifier                                      |
|-----------------------------------------------|----------------------------------------------------------|-------------------------------------------------|
| DAB peroxidase substrate kit                  | Vector Laboratories                                      | SK4100                                          |
| Papain Dissociation System                    | Worthington Biochemical Corp                             | Cat# LK003150                                   |
| <b>Experimental Models: Organisms/Strains</b> |                                                          |                                                 |
| Mouse: CAGGCre-ERTM; RCE (GFP)                | This paper Hayashi and McMahon, 2002; Sousa et al., 2009 | N/A                                             |
| Mouse: Pax6loxP                               | Simpson et al., 2009                                     | N/A                                             |
| <b>Software and Algorithms</b>                |                                                          |                                                 |
| Graphpad Prism 8                              | Graphpad software                                        |                                                 |
| pClamp                                        | Molecular Devices                                        |                                                 |
| Matlab_R2018b                                 | Mathworks                                                |                                                 |
| Fiji (Image J)                                | Schindelin et al., 2012                                  | <a href="https://fiji.sc/">https://fiji.sc/</a> |
| IMARIS 9.1.2                                  | Bitplane                                                 |                                                 |
